# Supplementary material for: Reclaiming comprehensive public health
Source: HighWire-hosted journal article supplement (doi:10.1136/bmjgh-2020-003886), 2020-09-01
Supplement: bmjgh-2020-003886supp001_data_supplement.pdf [file bmjgh-2020-003886supp001_data_supplement.pdf]

Spanish translation of *BMJ Global Health* 2020;5:e003886.doi:10.1136/bmjgh-2020-003886

## Reclamando una salud pública integral

Rene Loewenson,<sup>1</sup> Kirsten Accoe,<sup>2</sup> Nitin Bajpai,<sup>3</sup> Kent Buse,<sup>4</sup> Thilagawathi Abi Deivanayagam,<sup>5</sup> Leslie London,<sup>6</sup> Claudio A Méndez,<sup>7</sup> Tolib Mirzoev,<sup>8</sup> Erica Nelson,<sup>9</sup> Ateeb Ahmad Parry,<sup>10</sup> Ari Probandari,<sup>11</sup> Eric Sarriot,<sup>12</sup> Moses Tetui,<sup>13</sup> André Janse van Rensburg<sup>14</sup>

**Para citar:** Loewenson R, Accoe K, Bajpai N, et al. Reclaiming comprehensive public health. *BMJ Global Health* 2020;5:e003886.doi:10.1136/bmjgh-2020-003886

**Disclaimer :** This material has been translated from the English original by Jorge Lembke with review from Claudio Méndez, Rene Loewenson and Erica Nelson. BMJ Publishing Group take no responsibility for the accuracy of the translation from the published English language original and are not liable for any errors that may occur.

### Recuadro de resumen

- Las respuestas mundiales y nacionales a la crisis de la COVID-19 ponen de relieve una tensión que existe desde hace mucho tiempo entre los enfoques de la salud pública centrados en la bioseguridad, autoritarios y a veces militarizados y, en contraste, con enfoques integrales, basados en las determinantes sociales, participativos y basados en derechos.
- A pesar de los principios que pueden limitar los derechos en interés de la salud pública y el papel de ciertas medidas centrales en algunas circunstancias, una salud pública eficaz en una pandemia prolongada como la COVID-19 requiere cooperación, comunicación, toma de decisiones participativas y acciones que salvaguarden los principios de Siracusa, el respeto de la dignidad de las personas y realidades y capacidades a nivel local.
- Sin embargo, cada vez hay más pruebas de una respuesta dominante para la COVID-19 en la que las decisiones se adoptan y aplican de manera excesivamente centralizada, no transparente y en un enfoque arriba-abajo, lo que a menudo implica coacción y abuso militar en las comunidades, aún cuando las evidencias demuestran el daño a largo plazo para la salud pública y los derechos humanos.
- En contraste, las experiencias de los enfoques de salud pública integral, en la equidad y participativos, que utilizan diversas fuentes de conocimientos, disciplinas y capacidades, muestran el tipo de enfoque de salud pública que será más eficaz para enfrentar los desafíos del siglo XXI en las pandemias, crisis climáticas, alimentarias y energéticas, la creciente desigualdad social, los conflictos y otras amenazas para la salud.

## INTRODUCCIÓN: DIFERENTES ENFOQUES DE SALUD PÚBLICA EN LA RESPUESTA A LA COVID-19

En los últimos 6 meses, hemos sido testigos de la diversidad en la propagación y gravedad de la COVID-19 y en la naturaleza y el momento de las respuestas a la misma en diferentes países y contextos.<sup>1</sup> Las emergencias agudas a menudo suelen movilizar atención y recursos en un corto período. Sin embargo, la COVID-19 es una pandemia prolongada que al propagarse, agrava las desigualdades socioeconómicas y ejerce presión sobre los sistemas sanitarios y democráticos de manera que exige respuestas sostenidas desde el ámbito local al global.

Las formas en que los diferentes gobiernos han respondido a la COVID-19 ponen de manifiesto las tensiones que existen desde hace tiempo entre los diferentes marcos y enfoques de la salud pública. En términos generales, un enfoque considera que las personas son sujetas de derechos que deberían involucrarse activamente en intervenciones proactivas que aborden los determinantes sociales de la salud, de manera que se respeten los derechos y la seguridad humana colectiva. En contraste, el segundo enfoque considera a las personas como objetos de intervenciones técnicas reactivas y biomédicas de "mando y control", con medidas de bioseguridad para proteger a las poblaciones contra los patógenos nocivos aplicadas rápidamente junto con enfoques autoritarios y militarizados cuando se considera que las epidemias amenazan los intereses socioeconómicos, políticos y la seguridad. Ambos enfoques integran los conocimientos y la tecnología, pero lo hacen de diferentes maneras y con diferentes fines. Si bien estos dos marcos han coexistido, impugnado y se han aplicado, a veces juntos, durante más de dos siglos, la COVID-19 ha exacerbado la tensión entre ellos. Esto tiene repercusiones a más largo plazo en la forma en que se entiende la salud pública y se abordan eficazmente los problemas de salud.

En este artículo, destacamos las deficiencias y los daños en la salud pública en el marco de una bioseguridad dominante y autoritaria. Argumentamos un enfoque integral, participativo e inclusivo de la salud pública que integre los derechos, las dimensiones sociales y las diversas fuentes de conocimiento, evidencia e innovación y que mantenga la equidad como un objetivo crítico.

El principio precautorio y las limitaciones de los derechos individuales en interés de la salud y la seguridad públicas son normas bien establecidas que van más allá de la salud pública y son incluidas en las constituciones y leyes. Cuando el riesgo es alto y existen medidas eficaces para la población, como la vacunación o el tratamiento del agua, las decisiones pueden adoptarse de forma centralizada para garantizar la protección más amplia de la población, especialmente cuando no hay alternativas igualmente eficaces que puedan lograr los mismos beneficios para la población. Se pueden aplicar medidas a nivel central para invertir en tecnologías, orientar y apoyar las capacidades locales o asegurar la cobertura universal. Una emergencia aguda o una pandemia de rápido desarrollo pueden provocar la demanda de una acción rápida y de amplio alcance impulsada centralmente. Sin embargo, la pandemia de la COVID-19 presenta un caso complejo, en el que todavía están surgiendo los efectos intencionales y no intencionales de las medidas aplicadas a diferentes niveles.

Esta pandemia prolongada requiere la cooperación y la comunicación efectiva entre los niveles nacional y local, incluidas las comunidades, aplicada de manera que se salvaguarde el respeto de la dignidad de las personas, se apoye la capacidad a nivel local y se conecte con los idiomas, las culturas, los conocimientos y las realidades de las personas.<sup>1,2</sup> Las decisiones adoptadas en el ámbito de la salud pública requieren evidencias de una serie de disciplinas y ciencias, así como de experiencias y perspectivas de todos los niveles, con comunicación sobre la forma en cómo se decidieron los compromisos. No se pueden importar modelos de respuestas eficaces y orientaciones simplificadas de un entorno a otro, sin adaptarlas a los diversos contextos de manera participativa, transparente y que genere confianza en las autoridades desde los implementadores y las comunidades.<sup>3</sup> Si bien la respuesta de salud pública no es independiente de un contexto sociopolítico más amplio, su encuadre e implementación pueden, no obstante, corregir las desigualdades y reforzar el empoderamiento social, la cohesión, la solidaridad y la seguridad humana.<sup>3</sup> Tal como lo han expresado sistemáticamente la Organización de Naciones Unidas (ONU) y sus organismos,<sup>1</sup> colectivamente, sólo estamos tan libres de riesgos como los más vulnerables de la sociedad. Si la práctica de la salud pública refleja y no se enfrenta a los desequilibrios de poder y las desigualdades subyacentes que generan riesgo y vulnerabilidad, todos estaremos inseguros. Por lo tanto, en su calidad de pandemia, la COVID-19 también requiere cooperación, comunicación y solidaridad entre los países y las organizaciones internacionales, tal como se prevé en el Reglamento Sanitario Internacional (RSI) de 2005, los Objetivos de Desarrollo Sostenible y las Declaraciones sobre Atención Primaria de Salud de 1978 y 2018.<sup>4</sup>

¿Cómo juzgaremos la respuesta de la salud pública a la COVID-19? ¿Fue impulsada por los derechos, participativa, equitativa, compasiva y basada en la solidaridad? ¿Se fomentaron, se pusieron a disposición y se consideraron de forma transparente diversas formas de evidencias y experiencias? ¿Se reconoció el carácter político y ético basado en valores de las decisiones e intervenciones? ¿Se alentó el diálogo abierto, la autorreflexión, el intercambio de información y la ciudadanía activa?

## **EVIDENCIA DE DAÑOS EN UNA RESPUESTA DE BIOSEGURIDAD AUTORITARIA**

A medida que la pandemia se desarrolle, en retrospectiva proporcionará más respuestas a estas preguntas. Sin embargo, en una pandemia como la COVID-19 que se acelera rápidamente, ya hay cada vez más evidencias de que se han tomado decisiones de manera centralizada, frenética y de manera arriba-abajo, limitando las opciones locales incluso exigiendo flexibilidad local y asumiendo la capacidad de respuesta de las comunidades y los sistemas de salud.<sup>1</sup> Si bien los informes regionales sugieren que las respuestas rigurosas al principio de la pandemia se asociaron a una menor prevalencia de la COVID-19 en algunos países<sup>5</sup>, los confinamientos, prohibiciones y cuarentenas a más largo plazo plantean problemas a grupos ya vulnerables en diversos países y entornos, con una deuda sanitaria acumulada por la pérdida de ingresos, la inseguridad alimentaria, la soledad y la muerte en soledad, los problemas de salud mental y la discontinuidad de la atención preventiva, promocional y curativa de otras condiciones de salud.<sup>1</sup> Esto es particularmente cierto cuando las medidas son prolongadas, descuidan realidades vividas, se dirigen

desproporcionadamente a las comunidades desfavorecidas y no proporcionan una protección social adecuada.

Una preocupación importante e inmediata es la militarización y el uso de "narrativas de guerra" que comparan a la COVID-19 con una batalla y relacionan la pandemia con el hecho de estar en guerra, refiriéndose al "enemigo", con llamadas a "salvar la economía" y a los trabajadores esenciales etiquetados como "guerreros de la primera línea".<sup>6</sup> Las capacidades militares pueden contribuir a movilizar la logística y la infraestructura. Sin embargo, en muchos países del mundo, las fuerzas de seguridad del estado y no los trabajadores de la salud pública o el personal local encargado de hacer cumplir la ley se han desplegado en las comunidades para contener la propagación de la COVID-19.<sup>1,6-8</sup> El personal militar desplegado en las comunidades responde al incumplimiento con la fuerza, a pesar de las dificultades que muchos, incluidos los trabajadores migrantes, los vendedores ambulantes, las personas que viven en las calles y otros tienen con las medidas impuestas.<sup>1,8,9</sup> De diversas regiones del mundo se han recibido múltiples informes de abusos por parte de la policía o el poder militar por violaciones del toque de queda o el confinamiento, en forma de desalojos forzosos masivos, detenciones, asesinatos y muertes bajo custodia.<sup>17</sup> Por ejemplo, Sudáfrica registró 230,000 detenciones y 11 muertes por las fuerzas de seguridad entre marzo y abril durante su cuarentena,<sup>7</sup> y en los últimos meses los organismos de las Naciones Unidas informan de cientos de miles de personas detenidas por la COVID-19 en diversos países del mundo.<sup>1</sup>

Tales respuestas militarizadas a la COVID-19 se sustentan en un enfoque autoritario y centrado en la bioseguridad, con imposiciones drásticas y rápidas a menudo realizadas por aparatos de seguridad que no informan al público de manera oportuna y transparente. Esto es comparable a las medidas que los gobiernos adoptan en tiempo de guerra, ignorando el papel crucial que un público informado puede desempeñar para asegurar respuestas eficaces a las amenazas a la salud pública. La COVID-19 fue declarada una emergencia nacional en muchos países, después de que la Organización Mundial de la Salud (OMS) nombrara a la COVID-19 como una Emergencia de Salud Pública de Interés Internacional, según se define en el RSI de 2005. Sin embargo, esto se ha utilizado luego para aplicar leyes de emergencia de amplio alcance y un poder ejecutivo centralizado sobre la acción descentralizada local en diferentes entornos de ingresos altos, medios y bajos.<sup>9</sup> Con frecuencia, esas medidas se han adoptado sin una información pública clara y pertinente sobre la justificación científica o la estrategia de salida, a menudo sin la participación de los residentes locales o sus representantes y sin tener en cuenta la viabilidad de las medidas, por ejemplo, exigiendo el distanciamiento físico en los barrios marginales superpoblados.<sup>2</sup> Las empresas privadas y los gobiernos han introducido en muchas partes del mundo la vigilancia de los movimientos de las personas a través de plataformas de satélite y de aplicaciones de telefonía móvil, a menudo utilizando poderes de emergencia para limitar la privacidad y otros derechos.<sup>10</sup> Esas prácticas suscitan preocupación por lo temporal, necesaria y proporcionada que es esa vigilancia y por la forma en que se está utilizando la pandemia para promover cambios radicales en la forma en que interactuamos con las tecnologías digitales de la salud sin tener en cuenta las futuras consecuencias de las enormes cantidades de datos sobre la salud que están almacenados por entidades que a menudo no están bajo control público.<sup>10</sup>

Las respuestas militares en el ámbito de la salud mundial señalan el legado más profundo tanto del colonialismo como de la medicina coercitiva, al que se ha sumado en los últimos decenios la percepción de los organismos de seguridad de que las epidemias suponen una amenaza para los intereses económicos y la estabilidad política.<sup>11</sup> Tanto el VIH como el Ébola fueron identificados por las Naciones Unidas como amenazas para la paz y la seguridad, y militares fueron desplegados en las comunidades en el brote de Ébola de 2014 en África occidental.<sup>11</sup> Por lo tanto, una respuesta militarizada en materia de bioseguridad no es exclusiva de la COVID-19. Sin embargo, el hecho de dejar de lado los conocimientos especializados de los ministerios de salud, el personal de salud pública y las comunidades al situar la gestión de la COVID-19 en sectores de seguridad centralizados con escasa experiencia en materia de salud pública, cambia fundamentalmente la naturaleza de la respuesta.<sup>8</sup> Puede desviar recursos a los sectores de defensa o a respuestas reactivas, coercitivas y que promueven el miedo y alejarlos de los complejos sistemas de adaptación necesarios para realizar intervenciones de salud pública eficaces y sostenidas como hacer pruebas, rastrear y proteger.<sup>8</sup> Se estima que la respuesta militar a la epidemia de Ébola de 2014-2016 en África Occidental ha costado tres veces más de lo que se habría necesitado para establecer una infraestructura para que el sistema de salud funcione bien.<sup>11</sup>

Los enfoques de bioseguridad militarizados y excesivamente centralizados socavan la cohesión social y la solidaridad, fomentan la utilización de chivos expiatorios y amplían el discurso peyorativo sobre los migrantes, los refugiados, las minorías y otras personas como "amenazas" en la propagación de la pandemia, permitiendo la discriminación.<sup>12</sup> Este enfoque puede reforzar una reciente tendencia de extrema derecha, autoritaria y nacionalista en la política, asociada a la polarización, el populismo y el racismo, que se manifiesta de diferentes maneras en las distintas regiones.<sup>13</sup> Organizar las respuestas de salud pública de esta manera puede fomentar la discriminación, incluso involuntariamente, y minar la confianza social a largo plazo en el terreno.

Medidas como exigir la obediencia al mando, en lugar de la solidaridad y la acción informada, y al utilizar el derecho penal para imponer el cambio de comportamiento, hacen perder el empoderamiento y enajenan a las comunidades de su papel central en la contención de la COVID-19, debilitando paradójicamente la adhesión a las medidas de comportamiento.<sup>1</sup> Las respuestas técnicas de bioseguridad y el aprendizaje incorrecto de los fracasos -incluida la falta de aprendizaje de las epidemias anteriores- corren el riesgo de socavar los valores, los derechos y los conocimientos de los que depende una salud pública eficaz. No escuchar a las comunidades y a los trabajadores de la primera línea puede dar lugar a restricciones más duras e inviables para ciertos grupos que contribuyen a ampliar la desigualdad. Por ejemplo, los toques de queda en los hogares privan a los trabajadores del sector informal de sus medios de vida, mientras que sólo los grupos de ingresos más altos pueden aprovechar el trabajo remoto o la escolarización en el hogar. Las medidas impuestas y la información poco clara, tardía y contradictoria generan miedo, ira, desconfianza y preocupaciones por la salud mental y pueden llevar a comportamientos sociales clandestinos, lo que dificulta las respuestas eficaces.<sup>1,8</sup> Ignorar las realidades en el terreno genera una creciente deuda de salud, ya que las personas con otras condiciones no buscan ni reciben la atención adecuada. Tales respuestas pueden potencialmente perjudicar

la relación entre las comunidades y el Estado que contribuyan a la salud pública y exacerbar los factores determinantes para problemas de salud, como el aumento de la violencia de género durante los confinamientos, la exclusión prolongada de la escolarización, que afecta sobre todo a los niños de menores ingresos, y la inseguridad alimentaria y de ingresos.<sup>14</sup> Estas consecuencias pueden socavar el apoyo a medidas eficaces y pueden ser muy contraproducentes para contener una pandemia o sus repercusiones a largo plazo en la salud.

La simplificación excesiva, la utilización de chivos expiatorios y la reestructuración de las respuestas de salud pública también han desplazado los fondos y la autoridad institucional a grandes agentes privados y empresariales, y la salud pública a las instituciones nacionales de bioseguridad.<sup>15,16</sup> La reorganización de los organismos nacionales de salud pública y el rechazo selectivo de las evidencias de salud pública sin consultar a los expertos y al personal puede ser derrochadora, desmoralizante y contraproducente. Si bien la privatización y la mercantilización de los sistemas de salud pública no son algo nuevo, la pandemia ha brindado la oportunidad de intensificarla en algunos entornos, en contraste con los enfoques que coordinan la acción del sector privado bajo la dirección del sector público. Justificar estos cambios como necesarios durante una emergencia pone una cortina de humo sobre la manera en que la austeridad y la privatización a largo plazo pueden por sí mismas socavar la oportunidad de una respuesta de salud pública eficaz.<sup>16</sup> Haciendo caso omiso de los recordatorios de la OMS de que el riesgo de la pandemia permanece hasta que todos estén protegidos, un sentido de amenaza y autoprotección ha llevado a un acopio inequitativo de tecnologías sanitarias esenciales y al nacionalismo de las vacunas en los países de altos ingresos, socavando la prevención de riesgos y la solidaridad internacionales previstas en el RSI de 2005.<sup>4,17</sup> Las leyes de emergencia que permiten un enfoque de bioseguridad han alterado los controles y equilibrios de los poderes ejecutivos de los gobiernos, permitiendo que millones de dólares recaudados internacionalmente o movilizados de los ingresos públicos se apliquen sin el adecuado escrutinio parlamentario o público, incluso mientras grandes sectores de la población luchan por sobrevivir y se enfrentan a crisis de salud mental con la pérdida de ingresos bajo confinamiento.<sup>9</sup>

## **AVANZANDO HACIA UNA RESPUESTA DE SALUD PÚBLICA INTEGRAL**

La bioseguridad no es igual a la salud pública. La salud pública es la ciencia y el arte de prevenir la enfermedad, prolongar la vida y promover la salud a través de los esfuerzos organizados de la sociedad<sup>18</sup> (p 2). Se implementa a través de la participación, los esfuerzos organizados y las elecciones informadas de la sociedad, el estado y las organizaciones no gubernamentales. Actúa sobre los determinantes sociales de la salud y la equidad sanitaria desde los niveles próximos a los estructurales, mediante la organización de políticas, servicios y medidas sociales para asegurar y mejorar las condiciones y capacidades para la salud y el bienestar de todos. No podemos permitir que la respuesta a la COVID-19 reduzca la salud pública en la práctica institucional y en la mente del público a la bioseguridad solamente, tratando a las personas como objetos y no como agentes, socavando el conocimiento, la equidad, los derechos y décadas de trabajo previo. Necesitamos proteger y promover una salud pública que esté arraigada en el interés público y en la población; que sea proactiva, eficaz, participativa, con principios, justa,

basada en evidencias científicas y sociales; que actúe profundamente sobre los determinantes sociales de la salud y que fomente la cooperación entre la salud, otros sectores y comunidades y entre los países globalmente.

Para ello se parte de una relación diferente con el nivel local y las comunidades, como una cuestión de derechos y justicia y para la eficacia de la salud pública. La organización local, los conocimientos sanitarios, el liderazgo local, las ideas, las innovaciones y la acción son necesarios para prevenir la infección y proporcionar protección y atención social. Son fundamentales para una respuesta eficaz de salud pública.<sup>12,17</sup> Hay muchos ejemplos de participación afirmativa de la comunidad en la respuesta a la COVID-19 en todas las regiones del mundo.<sup>1,19-21</sup> Muestran alternativas de acción social y colaboración entre comunidades y estados que contrastan con respuestas de bioseguridad inapropiadas y excesivamente centralizadas. Al entrar en el sexto mes de la declaración de esta pandemia, haríamos mejor en dialogar, trabajar y respetar al público y a los diversos profesionales, compartiendo el conocimiento y la información para entender y actuar sobre el riesgo.

Necesitamos proteger un enfoque ético, científico y basado en el enfoque de derechos para la salud pública, como los principios de Siracusa de las Naciones Unidas que se muestran en el recuadro 1.<sup>22</sup>

**Recuadro 1: El Consejo Económico y Social de las Naciones Unidas en sus principios de Siracusa de 1984**

El Consejo Económico y Social de las Naciones Unidas, en sus principios de Siracusa de 1984, guía al estado a ejercer sus poderes para las medidas que restringen las libertades individuales de una manera que:

1. Se lleva a cabo de acuerdo con la ley.
2. Tiene el claro propósito de mejorar o mantener la salud pública mediante el cumplimiento de servicios y funciones esenciales de salud pública, como objetivo legítimo de interés general.
3. Se basa en pruebas científicas y no se redacta ni se impone de forma arbitraria.
4. Es estrictamente necesaria en una sociedad democrática para lograr el objetivo.
5. Está bien orientada, mediante la alternativa menos restrictiva, no se aplica a más personas de las necesarias para la salud pública, y dado que no hay medios menos intrusivos y restrictivos disponibles para alcanzar el mismo objetivo.
6. Se basa en el principio precautorio.
7. Incluye la educación continua en materia de salud pública y la divulgación para alentar, facilitar y promover la participación de la comunidad en el logro de los objetivos de salud pública.
8. Es respetuosa de la dignidad humana y no discrimina ilegalmente a las personas.
9. Es de duración limitada y está sujeta a revisión.<sup>22</sup>

Al igual que todos los enfoques basados en los derechos, los principios cobran vida cuando son conocidos, implementados y defendidos por todos de manera que se construye un poder colectivo, en lugar de un poder dominante. Los principios están sujetos a interpretación. Por consiguiente, las decisiones adoptadas en aras del "bien público" deben

ser examinadas en función de los conocimientos técnicos, las evidencias, las consultas realizadas y los intereses sociopolíticos y de poder que las sustentan, así como las medidas incluidas para la rendición de cuentas y el aprendizaje a partir de la acción. La evidencia aplicada debe incluir todo el espectro de conocimientos organizados sistemáticamente, incluidos los de los implementadores y las experiencias vividas por las comunidades. A diferencia de una respuesta autoprotectora, la salud como derecho humano debe entenderse y aplicarse como una responsabilidad colectiva, dentro de los países y globalmente.<sup>1</sup>

“Los actores de la salud, los líderes comunitarios y las comunidades deben construir conjuntamente opciones para la respuesta a la COVID-19 que sean aceptables y factibles, y que fomenten el compromiso de las comunidades afectadas”<sup>21</sup> (p 2). En parte, hacerlo implica un diseño proactivo de medidas mediante una gobernanza descentralizada y un compromiso más profundo y matizado con los profesionales locales de la salud, los servicios sociales, las autoridades locales, las organizaciones de la sociedad civil y los diferentes grupos sociales, incluidas las comunidades marginadas y los jóvenes. Este tipo de compromiso ayuda a interpretar y adaptar localmente las orientaciones para aplicar eficazmente las respuestas clave, entre ellas hacer las pruebas, el rastreo y la protección de las personas; la prevención y el control de los brotes y el apoyo a los grupos vulnerables. También requiere una mejor y honesta comunicación en mensajes apropiados para las diversas necesidades, con una divulgación de alfabetización en salud para construir una acción informada y una rendición de cuentas. Pide que se advierta oportunamente de las medidas de control de los brotes y de las estrategias de apoyo y de salida. Exige que se preste atención explícita a la equidad, la no discriminación y a la aplicación de medidas de salud pública de manera que se fomente la confianza y se combata el estigma, el racismo y la xenofobia. No tenemos una pizarra en blanco al respecto. Hemos extraído enseñanzas de la respuesta al VIH, en la que los propios afectados desafiaron el silencio, el abandono y el estigma, y crearon conjuntamente la acción de colaboración; de las respuestas "de abajo arriba" al Ébola en África<sup>1,21</sup> y de las muchas experiencias positivas en las respuestas que surgen de la COVID-19, señaladas anteriormente, que proporcionan un aprendizaje valioso para la salud pública.<sup>1,17,19,20</sup>

## **CONCLUSIÓN: ELEGIENDO UN ENFOQUE DE SALUD PÚBLICA INTEGRAL Y PARTICIPATIVO**

La COVID-19 estará con nosotros a largo plazo. No será la última pandemia. No necesitamos y no debemos coaccionar, aterrorizar, fatigar, socavar y dañar la confianza pública y los sistemas de salud pública en nuestra respuesta. Necesitamos una respuesta de salud pública que genere comunicación, comprensión, aprendizaje, capacidades, responsabilidad civil, innovaciones locales y solidaridad global. La COVID-19 ha estimulado una extraordinaria movilización de respuesta en poco tiempo. Ofrece la oportunidad de aprender, reflexionar y construir una forma eficaz de salud pública para hacer frente a un siglo XXI que se enfrenta a múltiples crisis, entre ellas las futuras pandemias, el clima, los alimentos, la energía, el trabajo precario, la grotesca y creciente desigualdad social, los conflictos y otras amenazas. En la medida en que ha habido una tendencia histórica hacia respuestas centralizadas y autoritarias en materia de bioseguridad, también ha habido movimientos en pugna hacia una salud pública integral, actuando sobre

los determinantes sociales, participativa e impulsada por la justicia, en diferentes regiones, países y globalmente. Reclamemos, apoyemos, invirtamos y pongamos en práctica esta última versión de la salud pública.

### Afiliaciones de los autores

<sup>1</sup>Centro de Apoyo a la Formación y la Investigación (TARSC), Harare, Zimbabue

<sup>2</sup>Departamento de Salud Pública, Instituto de Medicina Tropical, Amberes, Bélgica

<sup>3</sup>Departamento de Salud, Sarvodaya Gram Udyog Seva Sansthan, Noida, India

<sup>4</sup>El Instituto George para la Salud Mundial, Universidad de Nueva Gales del Sur, Newtown, Nueva Gales del Sur, Australia

<sup>5</sup>Salud Pública, Educación en Salud Inglaterra Noroeste, St. Helens y Knowsley Teaching Hospitals NHS Trust, Prescott, Reino Unido

<sup>6</sup>Escuela de Salud Pública y Medicina Familiar, Universidad de Ciudad del Cabo, Rondebosch, Western Cape, Sudáfrica

<sup>7</sup>Instituto de Salud Pública, Facultad de Medicina, Universidad Austral de Chile, Valdivia, Chile

<sup>8</sup>Centro Nuffield para la Salud y el Desarrollo Internacional, Universidad de Leeds, Leeds, Reino Unido

<sup>9</sup>Departamento de Salud Pública, Medio Ambiente y Sociedad, Escuela de Higiene y Medicina Tropical de Londres, Londres, Reino Unido

<sup>10</sup>Escuela de Salud Pública BRAC James P Grant, Universidad BRAC, Dhaka, Distrito Dhaka, Bangladesh

<sup>11</sup>Salud Pública, Universitas Sebelas Maret, Surakarta, Jawa Tengah, Indonesia

<sup>12</sup>Salud Mundial, Save the Children Federation, Washington, DC, EE.UU.

<sup>13</sup>Departamento de Política, Planificación y Gestión de la Salud, Escuela de Salud Pública de la Universidad de Makerere, Kampala, Uganda

<sup>14</sup>Centro de Salud Rural, Escuela de Ciencias de la Salud Universidad de KwaZulu-Natal, Durban, KwaZulu-Natal, Sudáfrica

**Agradecimientos** El Grupo de Trabajo Temático (GTT) SHAPES de Health Systems Global actuó como plataforma para expresar interés en este artículo y facilitar la colaboración en ella. Agradecemos la contribución a los debates de fondo sobre las cuestiones con otros miembros del GTT SHAPES, a saber, G Bloom, S Dorcoo, S Fischer, N Howard, B Kaim, J Lohman, H MacGregor, M Mamdani, B Pratt, E Paul, E Sacks, P Srinivas, S Topp, G van Heteren y C Wenham y la contribución de D Nambiar, AL Ruano, B Taderera y A Zwi en las ediciones técnicas.

### Referencias

1. UNAIDS. Rights in a pandemic: Lockdowns, rights and lessons from HIV in the early response to COVID-19, 2020. Available: [https://www.unaids.org/sites/default/files/media\\_asset/rights-in-a-pandemic\\_en.pdf](https://www.unaids.org/sites/default/files/media_asset/rights-in-a-pandemic_en.pdf) [Accessed 31 Aug 2020].
2. Corburn J, Vlahov D, Mberu B, et al. Slum health: arresting COVID-19 and improving well-being in urban informal settlements. *J Urban Health* 2020;97:348–57.

3. Gilson L, Doherty J, Loewenson R, et al. Challenging inequity through health systems, final report of the knowledge network on health systems, who Commission on the social determinants of health, 2007. Available: [https://www.who.int/social\\_determinants/resources/csdh\\_media/hskn\\_final\\_2007\\_en.pdf](https://www.who.int/social_determinants/resources/csdh_media/hskn_final_2007_en.pdf) [Accessed 28 Aug 2020].
4. Taylor AL, Habibi R, Burci GL, et al. Solidarity in the wake of COVID-19: reimagining the International health regulations. *Lancet* 2020;396:82–3.
5. Blavatnik School of Government. Regional reports summarising recent changes in government responses, 2020. Available: <https://www.bsg.ox.ac.uk/research/research-projects/coronavirus-government-response-tracker> [Accessed 30 Aug 2020].
6. Rohela P, Bhan A, Ravindranath D, et al. Must there be a “war” against coronavirus? *Indian J Med Ethics* 2020.
7. Haffajee F. Ramaphosa calls 11 lockdown deaths and 230,000 arrests an act of ‘over-enthusiasm’ – really! Dly. Maverick., 2020. Available: <https://www.dailymaverick.co.za/article/2020-06-01-ramaphosa-calls-11-lockdown-deaths-and-230000-arrests-an-act-of-over-enthusiasm-really/> [Accessed 26 Aug 2020].
8. Gibson-Fall F. Coronavirus: how to avoid military responses becoming a double edged swords, 2020. Available: <https://theconversation.com/coronavirus-how-to-avoid-military-responses-becoming-double-edged-swords-135262> [Accessed 30 Aug 2020].
9. Fassin D, Lipman J. An unprecedented health crisis: Didier Fassin on the global response to the Covid pandemic, 2020. Available: <https://www.ias.edu/ideas/fassin-covid-global-response> [Accessed 27 Aug 2020].
10. International A. COVID-19 surveillance and the threat to your rights, amnesty international, 2020. Available: <https://www.amnesty.org/en/latest/news/2020/04/covid-19-surveillance-threat-to-your-rights/> [Accessed 31 Aug 2020].
11. Snowden FM. Epidemics and society: from the black death to the present. 1 edn. London: Yale University Press, 2019. <https://news.yale.edu/2019/10/24/epidemics-and-society-black-death-present>
12. Egede LE, Walker RJ, Racism S. Structural racism, social risk factors, and Covid-19 - A dangerous convergence for black Americans. *N Engl J Med* 2020;383:e77.
13. Hart G. Resurgent nationalisms & populist politics in the neoliberal age. *Geogr Ann Ser B Hum Geogr* 2020.
14. Dasgupta J, Schaaf M, Contractor SQ, et al. Axes of alienation: applying an intersectional lens on the social contract during the pandemic response to protect sexual and reproductive rights and health. *Int J Equity Health* 2020;19:130.
15. Pollock A. Thanks to outsourcing, England’s test and trace system is In Chaos. *The Guardian*, 2020. Available: <https://www.theguardian.com/commentisfree/2020/jul/31/outsourcing-england-test-trace-nhs-private> [Accessed 27 Aug 2020].
16. The Health Foundation. PHE reorganisation is highly risky and justification for the change has not been fully set out, 2020. Available: <https://www.health.org.uk/news-and-comment/news/phe-reorganisation-is-highly-risky-and-justification-has-not-been-fully-set-out> [Accessed 27 Aug 2020].
17. Loewenson R. COVID-19 in East and southern Africa: rebuilding differently and better must start now. *MEDICC Rev* 2020;22:59.

18. WHO. European action plan for strengthening public health capacities and services - resolution EUR/RC62/R5, 2012. Available: [https://www.euro.who.int/\\_\\_data/assets/pdf\\_file/0005/171770/RC62wd12rev1-Eng.pdf](https://www.euro.who.int/__data/assets/pdf_file/0005/171770/RC62wd12rev1-Eng.pdf) [Accessed 31 Aug 2020].
19. Scheepers E, Lakhani I, Armstrong K. Making a community action net (work): organising in the times of COVID-19. OpenGlobalRights, 2020. Available: <https://www.openglobalrights.org/organising-in-the-times-of-COVID-19/> [Accessed 31 Aug 2020].
20. Franco D I, Ortiz C, Samper J, et al. Mapping repertoires of collective action facing the COVID-19 pandemic in informal settlements in Latin American cities. *Environ Urban* 2020.
21. Anoko JN, Barry BR, Boiro H, et al. Community engagement 22 United Nations. The Siracusa principles on the limitation and for successful COVID-19 pandemic response: 10 lessons from Ebola outbreak responses in Africa. *BMJ Glob Health* 2020;4:3121:e003121.
22. United Nations. The Siracusa principles on the limitation and Derogation provisions in the International covenant on civil and political rights. *Hum Rights Q* 1985;7:3

**Editor de manejo:** Seye Abimbola

Recibido el 3 de septiembre de 2020

Aceptado el 8 de septiembre de 2020

© Autor(es) (o su(s) empleador(es)) 2020. Reutilización permitida según CC BY-NC. No se permite la reutilización comercial. Ver derechos y permisos. Publicado por BMJ. Para las afiliaciones numeradas, véase el final del artículo.

**Correspondencia con:** Dr. Rene Loewenson; [rene@tarsc.org](mailto:rene@tarsc.org)

**Colaboradores** RL inició un borrador de puntos conceptuales clave al que todos los autores hicieron aportaciones y que se utilizó para preparar un primer borrador. Todos los autores hicieron aportaciones de texto a los borradores iterativos y proporcionaron materiales de referencia utilizando un software de edición de documentos en línea compartido. RL coordinó los aportes y editó el manuscrito final.

**Financiación** Los autores no han declarado una subvención específica para esta investigación por parte de ningún organismo de financiación de los sectores público, comercial o sin fines de lucro.

**Intereses en competencia** No se ha declarado ninguno.

**Consentimiento del paciente para la publicación** No se requiere

**Procedencia y revisión por pares** No se ha encargado; se ha examinado internamente por pares.

**Declaración de disponibilidad de datos** No hay datos en este trabajo.

**Acceso abierto** Se trata de un artículo de acceso abierto distribuido de acuerdo con la licencia Creative Commons Attribution Non Commercial (CC BY-NC 4.0), que permite a otros distribuir, remezclar, adaptar, construir sobre esta obra sin fines comerciales y licenciar sus obras derivadas en términos diferentes, siempre que se cite adecuadamente la obra original, se dé el crédito apropiado, se indique cualquier cambio realizado y el uso sea no comercial. Véase: <http://creativecommons.org/licenses/by-nc/4.0/>.
